# Supplementary material for: Comparison of Collaborative Goal Setting With Enhanced Education for Managing Diabetes-Associated Distress and Hemoglobin A1c Levels: A Randomized Clinical Trial
Source: PubMed Central journal article supplement (PMC9069258; doi:10.1001/jamanetworkopen.2022.9975), 2022-05-04
Supplement: jamanetwopen-e229975-s002.pdf [file jamanetwopen-e229975-s002.pdf]

## Supplementary Online Content

Woodard L, Amspoker AB, Hundt NE, et al. Comparison of collaborative goal setting with enhanced education for managing diabetes-associated distress and hemoglobin A<sub>1c</sub> levels: a randomized clinical trial. *JAMA Netw Open*. 2022;5(5):e229975. doi:10.1001/jamanetworkopen.2022.9975

**eFigure 1.** Framework for Empowering Patients in Chronic Care (EPICC)

**eFigure 2.** Hemoglobin A<sub>1c</sub> Over Time for Enhanced Usual Care (EUC) by Exposure to an EPICC Clinician Between Postintervention and Maintenance

**eTable.** Differences in Baseline Characteristics of Participants by Completer Status

This supplementary material has been provided by the authors to give readers additional information about their work.

eFigure 1. Framework for Empowering Patients in Chronic Care (EPICC)

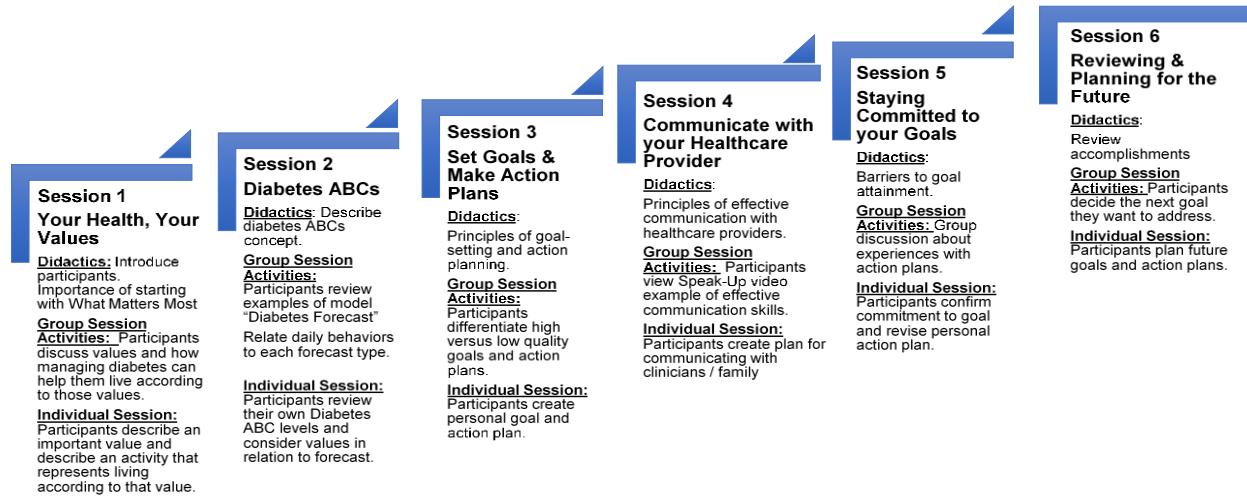

**Group Sessions:**

Each Session was an hour in duration, led by 1-2 clinic based health professionals. The first 20 minutes included an introduction and review of brief didactic materials. The middle portion of each session reviewed case examples and group discussion. The final 20 minutes provided group discussion that allow participants to begin to personalize the content their own lives.

**Individual Sessions:**

Health professionals used motivational interviewing techniques to help participants create a personal plan related to the session contents, review progress from prior visits, and help the participant with problem-solving tasks. Individual sessions had an average duration of 10 minutes per participant following each group session.

**eFigure 2. Hemoglobin A1c Over Time for Enhanced Usual Care (EUC) by Exposure to an EPICC Provider Between Postintervention and Maintenance**

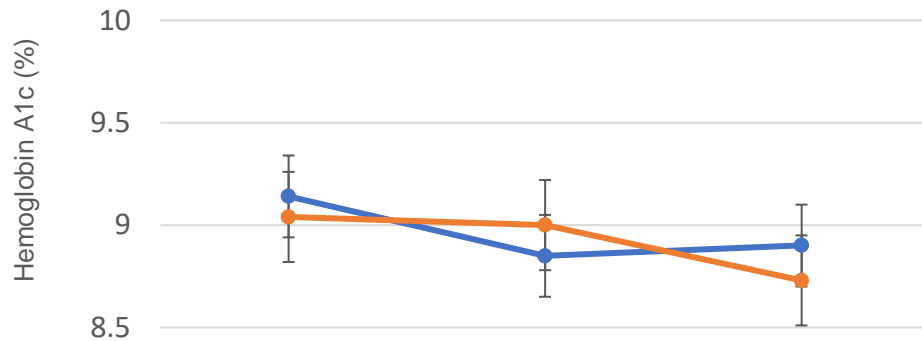

|                                                                                            | Baseline | Post-Intervention | Maintenance |
|--------------------------------------------------------------------------------------------|----------|-------------------|-------------|
| ● EUC- No visits with a Provider between Post-Intervention and Maintenance (n = 51)        | 9.14     | 8.85              | 8.9         |
| ● EUC- At least 1 visit with a Provider between Post-Intervention and Maintenance (n = 53) | 9.04     | 9                 | 8.73        |

Assessment Period

**eTable. Differences in Baseline Characteristics of Participants by Completer Status**

|                                                    | Non-Completer (n = 50) | Completer (n = 230) | p-value <sup>a</sup> |
|----------------------------------------------------|------------------------|---------------------|----------------------|
| Site, N (%)                                        |                        |                     | 0.50                 |
| Community Clinic A                                 | 13 (26.0)              | 66 (28.7)           |                      |
| Community Clinic B                                 | 6 (12.0)               | 48 (20.9)           |                      |
| Facility Clinic C                                  | 14 (28.0)              | 50 (21.7)           |                      |
| Facility Clinic D                                  | 8 (16.0)               | 37 (16.1)           |                      |
| Facility Clinic E                                  | 9 (18.0)               | 29 (12.6)           |                      |
| Gender, N (%)                                      |                        |                     | 0.15                 |
| Female                                             | 45 (90.0)              | 219 (95.2)          |                      |
| Male                                               | 5 (10.0)               | 11 (4.8)            |                      |
| Age in years, mean (SD)                            | 67.3 (8.4)             | 67.1 (8.5)          | 0.93                 |
| Race/Ethnicity, N (%)                              |                        |                     | 0.82 <sup>c</sup>    |
| Black                                              | 21 (42.0)              | 86 (37.4)           |                      |
| Hispanic                                           | 7 (14.0)               | 26 (11.3)           |                      |
| Non-Hispanic White                                 | 21 (42.0)              | 113 (49.1)          |                      |
| Other <sup>b</sup>                                 | 1 (2.0)                | 5 (2.2)             |                      |
| Education, N (%)                                   |                        |                     | 0.21                 |
| High school grad or less                           | 16 (32.0)              | 54 (23.5)           |                      |
| Some college or more                               | 34 (68.0)              | 176 (76.5)          |                      |
| Annual income, N (%), N = 258                      |                        |                     | 0.63                 |
| < \$20,000                                         | 12 (27.9)              | 68 (31.6)           |                      |
| \$20,000-\$39,999                                  | 11 (25.6)              | 64 (29.8)           |                      |
| ≥ \$40,000                                         | 20 (46.5)              | 83 (38.6)           |                      |
| Employment, N (%), N = 270                         |                        |                     | 0.51                 |
| Any employment                                     | 5 (10.6)               | 35 (15.7)           |                      |
| Unemployed                                         | 38 (80.9)              | 176 (78.9)          |                      |
| Retired or disabled                                | 4 (8.5)                | 12 (5.4)            |                      |
| Married/Living With Someone, N (%), n = 277        | 26 (52.0)              | 120 (52.9)          | 0.91                 |
| Lives Alone, N (%), N = 278                        | 20 (40.0)              | 69 (30.3)           | 0.18                 |
| Perceived health, mean (SD)                        | 3.5 (0.7)              | 3.46 (0.9)          | 0.77                 |
| Prior diabetes education, N (%)                    | 29 (58.0)              | 133 (57.8)          | 0.98                 |
| Hemoglobin (Hb) A1c, mean (SD)                     | 9.1 (1.6)              | 9.08 (1.4)          | 0.89                 |
| Diabetes Distress Score, mean (SD), n= 273         | 2.6 (1.1)              | 2.38 (1.0)          | 0.14                 |
| Diabetes Distress Score cut-points, n (%), N = 273 |                        |                     | 0.29                 |
| Little to No Distress (< 2.0)                      | 16 (33.3)              | 88 (39.1)           |                      |
| Moderate Distress (2.0 – 2.9)                      | 15 (31.3)              | 82 (36.4)           |                      |
| High Distress (> 3.0)                              | 17 (35.4)              | 55 (24.4)           |                      |
| Adherence, mean (SD), N = 274                      | 3.7 (2.2)              | 3.5 (2.1)           | 0.53                 |
| Self-efficacy, mean (SD), N = 275                  | 5.4 (2.2)              | 5.7 (2.4)           | 0.31                 |

<sup>a</sup> For comparison between completers and non-completers, using independent samples t-tests (for interval variables) or chi-square tests (for ordinal variables)

<sup>b</sup> Multiracial (White, American Indian, and Other endorsed n = 4), Other – Not Specified (n = 2)

<sup>c</sup> Comparison of Non-Hispanic White versus others
