# Supplementary material for: Comparison of Collaborative Goal Setting With Enhanced Education for Managing Diabetes-Associated Distress and Hemoglobin A1c Levels: A Randomized Clinical Trial
Source: PubMed Central journal article supplement (PMC9069258; doi:10.1001/jamanetworkopen.2022.9975), 2022-05-04
Supplement: jamanetwopen-e229975-s003.pdf [file jamanetwopen-e229975-s003.pdf]

## Data Sharing Statement

Woodard. Comparison of Collaborative Goal Setting With Enhanced Education for Managing Diabetes-Associated Distress and Hemoglobin A<sub>1c</sub> Levels. *JAMA Netw Open*. Published May 04, 2022. doi:10.1001/jamanetworkopen.2022.9975

### Data

**Data available:** No

### Additional Information

**Explanation for why data not available:** VA privacy rules limit availability of patient data
